# Supplementary material for: The hydroxy-analogue of selenomethionine alleviated lipopolysaccharide-induced inflammatory responses is associated with recover expression of several selenoprotein encoding genes in the spleens of Kunming mice
Source: Royal Society of Chemistry journal article supplement (doi:10.1039/c9ra07260h), 2019-01-01
Supplement: c9ra07260h1.pdf [file c9ra07260h1.pdf]

Online Supporting Material

Supplemental Table 1 Primers used for the Q-PCR of the target and reference genes

| Protein                    | Gene           | Accession number | Primer sequence (from 5' to 3')                       |
|----------------------------|----------------|------------------|-------------------------------------------------------|
| <b>Selenoprotein genes</b> |                |                  |                                                       |
| DIO1                       | <i>DIO1</i>    | NM_007860.3      | F: AAGCAAGAGGCAGGCATGTT<br>R: CGGCCAGAAAAGTGTTTCCA    |
| DIO2                       | <i>DIO2</i>    | NM_010050.2      | F: GGAATGTTGGCCAGTTTTGTTT<br>R: TGGTTACATGGGCTGGTGAGT |
| DIO3                       | <i>DIO3</i>    | NM_172119.2      | F: AGGTGTCTGAGTTGCGCACTT<br>R: TGCCTAGTACCATGCAACTGT  |
| GPX1                       | <i>GPX1</i>    | NM_008160.6      | F: AGGCTCACCCGCTCTTTACC<br>R: GGGTCGTCACTGGGTGTTG     |
| GPX2                       | <i>GPX2</i>    | NM_030677.2      | F: TGTGACGTCAATGGGCAGAA<br>R: AGGGCAGCTTGTCTTTCAGGTA  |
| GPX3                       | <i>GPX3</i>    | NM_008161.3      | F: ACAGGAGCCAGGCGAGAA<br>R: CCACCTGGTCGAACATACTTGA    |
| GPX4                       | <i>GPX4</i>    | NM_001037741.3   | F: GCCGGCTACAACGTCAAGTT<br>R: GGCATCGTCCCCATTTACAC    |
| MSRB1                      | <i>MSRB1</i>   | AF195142.1       | F: CAGCCTCAGTCACCGAATGA<br>R: ACCACCCTGGCTGGCATA      |
| SEP15                      | <i>SELENOF</i> | NM_053102.2      | F: TGGACGACAACGGGAACAT<br>R: CCACACTGTCTGTGTTCCACTTG  |
| SELH                       | <i>SELENOH</i> | NM_001033166.2   | F: ATTCCCGGCTGCTGGTTT<br>R: GGC GCGTTGGTGAATAA        |
| SELI                       | <i>SELENOI</i> | NM_027652.2      | F: GCTTTGGGAGCAGTGTGCTAT<br>R: AGCTCTGCTCCAGCAAGATCA  |
| SELK                       | <i>SELENOK</i> | NM_019979.2      | F: GGGTAGGATCAGTCACCTTCGT<br>R: TTCCTCATCCACCAGCCATT  |
| SELM                       | <i>SELENOM</i> | NM_053267.2      | F: GGAGACCTGTGGAGGATGACA                              |

|       |                |                |                           |
|-------|----------------|----------------|---------------------------|
|       |                |                | R: TCGGTGACAAAGGCCTTCAC   |
| SEPN1 | <i>SELENON</i> | NM_029100.2    | F: ACCGGATGGCCACCAGTT     |
|       |                |                | R: GGTCAGCCGTTCAAGCTGTT   |
| SELO  | <i>SELENOO</i> | NM_027905.2    | F: CCCAGGTATGCAAGTGGA     |
|       |                |                | R: AGTGGCAGTTCAGGCTCCAA   |
| SELP  | <i>SELENOP</i> | X99807.1       | F: CAGGGTCTGCAATTGCTTGA   |
|       |                |                | R: GAAAAGCCCCTGTCAGCTACA  |
| SEPS1 | <i>SELENOS</i> | NM_024439.3    | F: TGTAAAGCGGCAAGAGGCTTT  |
|       |                |                | R: GGGCATTAGATCTTCCTGCAT  |
| SELT  | <i>SELENOT</i> | NM_001040396.2 | F: TGCACTCGCATTTCGTGACA   |
|       |                |                | R: ACTGGAGCTCACCGCATTG    |
| SELV  | <i>SELENOV</i> | NM_175033.3    | F: GCTGCTAGCGCTCTCTGAAG   |
|       |                |                | R: GTGGATCGAGGGTTTCTGATTT |
| SEPW1 | <i>SELENOW</i> | AF015284       | F: GCCGTTGAGTCGTGTATTGT   |
|       |                |                | R: TCTCCTTGAGCTGGAGGTA    |
| SPS2  | <i>SEPHS2</i>  | NM_009266.3    | F: CGTTGGCATCGTGGAGAAG    |
|       |                |                | R: CGCGAGGCTTGCAATGAT     |
| TRXR1 | <i>TXNRD1</i>  | BC037643.1     | F: CACAAACAGCGAGGAGACCAT  |
|       |                |                | R: TTCCTACCGCCAGCAACT     |
| TRXR2 | <i>TXNRD2</i>  | NM_013711.3    | F: GTTCACGGTGGCGGATAGG    |
|       |                |                | R: GCTCCCTCATGCATACCATCTT |
| TRXR3 | <i>TXNRD3</i>  | C076605.1      | F: GGGACATACTGGACGGCAAA   |
|       |                |                | R: TAGCAGCTTGCCCTGCCTGTA  |

### **inflammation-related genes**

|              |                               |             |                           |
|--------------|-------------------------------|-------------|---------------------------|
| COX-2        | <i>COX-2</i>                  | NM_011198.4 | F: TGCCTCCCCTCCAGACTAGA   |
|              |                               |             | R: CAGCTCAGTTGAACGCCTTTT  |
| ICAM-1       | <i>ICAM-1</i>                 | NM_010493.3 | F: GGGACCACGGAGCCAATT     |
|              |                               |             | R: CTTGCGGCCTGAGATCCA     |
| IL-1 $\beta$ | <i>IL-1<math>\beta</math></i> | NM_008361.4 | F: GGTGTGTGACGTTCCCATTAGA |

|               |                                |             |                            |
|---------------|--------------------------------|-------------|----------------------------|
|               |                                |             | R: CGAGGCTTTTTTGTGTTTCATCT |
| IL-6          | <i>IL-6</i>                    | NM_031168.2 | F: AACACGGCCTTCCCTACTT     |
|               |                                |             | R: TTGGGAGTGGTATCCTCTGTGA  |
| IL-10         | <i>IL-10</i>                   | NM_010548.2 | F: GATGCCCCAGGCAGAGAA      |
|               |                                |             | R: CACCCAGGGAATTCAAATGC    |
| iNOS          | <i>iNOS</i>                    | AY090567.1  | F: GGATCTTCCCAGGCAACCA     |
|               |                                |             | R: TCCACAACCTCGCTCCAAGATT  |
| MCP-1         | <i>MCP-1</i>                   | NM_011333   | F: CCTGGATCGGAACCAAATGA    |
|               |                                |             | R: ACCTTAGGGCAGATGCAGTTTTA |
| TNF- $\alpha$ | <i>TNF-<math>\alpha</math></i> | NM_013693.3 | F: TCATGCACCACCATCAAGGA    |
|               |                                |             | R: GACATTCGAGGCTCCAGTGAA   |

**Housekeeping control genes**

|                |                                 |             |                         |
|----------------|---------------------------------|-------------|-------------------------|
| $\beta$ -ACTIN | <i><math>\beta</math>-ACTIN</i> | NM_007393.5 | F: ACCAGTTCGCCATGGATGAC |
|                |                                 |             | R: TGCCGGAGCCGTTGTC     |
| GAPDH          | <i>GAPDH</i>                    | GU214026.1  | F: AGGCCGGTGCTGAGTATGTC |
|                |                                 |             | R: TGCCTGCTTCACCACCTTCT |

---
